# Supplementary material
Source: PubMed Central journal article supplement (PMC3947199)

Supplemental Information for:

**Pyramidal neurons in prefrontal cortex receive  
subtype-specific forms of excitation and inhibition**

Anthony T. Lee\* <sup>1,2,3</sup>, Steven M. Gee\* <sup>1,2,3</sup>, Daniel Vogt <sup>1</sup>,

John L. Rubenstein <sup>1</sup>, and Vikaas S. Sohal† <sup>1,2,3</sup>

<sup>1</sup>Department of Psychiatry, <sup>2</sup>Center for Integrative Neuroscience,

and <sup>3</sup>Sloan-Swartz Center for Theoretical Neurobiology

University of California, San Francisco

675 Nelson Rising Lane

San Francisco, CA 94143-0444

\* These two authors contributed equally to this work

## SUPPLEMENTAL FIGURE CAPTIONS

**FIGURE S1. Classification of Type A and B neurons, and differences between callosal EPSPs in Type A and B neurons, Related to Fig. 1.** (A) Classification of Type A and Type B neurons based on a combination of the sag and rebound in response to a -250 pA pulse, and the afterhyperpolarization (AHP) following a +250pA current pulse. Type A neurons were classified as cells with combined values  $>6.5$  mV (dotted line). (B) Application of TTX and 4-AP eliminates excitatory responses to optogenetic stimulation of callosal projections. (C) EPSP dynamics in simultaneously recorded Type A and B neurons in cases that failed to evoke circuit inhibition ( $n = 3$  pairs). These experiments have a similar latency to EPSP peak as our other experiments ( $15.4 \pm 2.1$  msec in these experiments, compared to  $13.8 \pm 1.8$  msec in our complete dataset;  $p = 0.64$ ). In these experiments, the difference between the pattern of EPSPs in Type A and B neurons was also similar to our other experiments. Specifically, the ratio between the second and first response was  $1.57 \pm 0.57$  in Type A cells, and  $0.77 \pm 0.13$  and in Type B cells, compared to  $1.25 \pm 0.18$  and  $0.78 \pm 0.15$  respectively in our complete dataset. (D) Representative image of Type A (green) and Type B (red) neurons labeled with retrogradely transported fluorescent microspheres injected into the MD thalamus (red) and contralateral mPFC (green), respectively. (E) Current clamp responses of labeled Type A (coticothalamic, CT) and B (corticalcallosal, CC) neurons to injection of -250pA. (F) Optogenetic stimulation of callosal inputs elicit depressing EPSPs in labeled Type B (CC) neurons, but not in labeled Type A (CT) neurons.

**FIGURE S2. Blocking post-synaptic voltage-dependent  $\text{Ca}^{2+}$  channels and NMDARs does not alter EPSP dynamics in Type A neurons, Related to Fig. 2.** (A) Application of mibefradil (5  $\mu\text{M}$ ) + nimodipine (5  $\mu\text{M}$ ) + AP5 (50  $\mu\text{M}$ ) does not alter EPSP dynamics in Type A during optogenetic stimulation of callosal inputs (n = 4). (B) The paired-pulse ratio is not significantly different after applying these  $\text{Ca}^{2+}$  channel blockers (p = 0.19, n = 4).

**FIGURE S3. Blocking h-current has minimal effects on simulated EPSPs and spiking in Type A neurons, Related to Fig. 3.** (A) ZD7288 (25  $\mu\text{M}$ ) blocks  $I_h$  in Type A neurons. (B) ZD7288 (brown) has minimal effects on the current clamp responses of Type A neurons to injection of Type A or B current waveforms (averaged response shown in black, individual responses shown in gray). (C) The paired-pulse ratio during responses of Type A neurons to simulated EPSCs in these current waveforms is not significantly altered by blocking  $I_h$  current (p = 0.30 and 0.39 for Type A and B waveforms, respectively; n=4 cells). (D) Blocking  $I_h$  with ZD7288 also fails to significantly alter the amount of spiking in Type A neurons in response to scaled up, suprathreshold current waveforms (p = 0.79 and 0.13 for Type A and B waveforms, respectively; n=4 cells).

**FIGURE S4. Effects of blocking  $\text{GABA}_A$ Rs on EPSPs, and measuring inhibitory inputs to Type A and B neurons, Related to Fig. 4.** (A) A1: Picrotoxin (ptx; 10  $\mu\text{M}$ ) blocks outward currents that follow optogenetic stimulation of callosal inputs and represent feedforward inhibition in Type A neurons. A2: Ptx application prolongs EPSPs in Type A neurons evoked by optogenetic stimulation of callosal inputs. Thick lines represent the averaged EPSPs before (black) and after (red) ptx application. Before averaging, each EPSP trace was normalized by

the average amplitude of control EPSPs in that cell. Thin lines show individual normalized responses. **A3:** Ptx significantly prolongs the decay time constant for callosal EPSPs in Type A neurons (n=4 cells;  $p < 0.001$  by repeated measures ANOVA). **(B)** The dynamics of callosal EPSPs in Type A neurons are not significantly altered by application of ptx (black). To avoid epileptiform discharges, the light power was reduced to  $\sim 0.2 \text{ mW/mm}^2$ , i.e. 10% of the typical power, for some of these experiments. Spikes during responses in ptx have been truncated. **(C)** Ptx does not significantly alter the paired-pulse ratio for Type A neuron responses to optogenetic stimulation of callosal inputs ( $p = 0.37$ , n=4 cells). **(D)** Inhibitory currents peak  $\sim 2$  msec after excitatory currents during optogenetic stimulation of callosal inputs ( $p < 0.01$ ). **(E)** The average distance between FSINs and Type A or B neurons during experiments to measure connectivity from FSIN to these two subtypes ( $p = 0.271$ ). **(F)** Experimental design: We simultaneously recorded from a pair of Type A (red) and B (blue) neurons in SOM::Cre mice injected with virus to drive Cre-dependent ChR2-EYFP expression (orange). During optogenetic stimulation of ChR2-expressing SOM interneurons, we recorded simultaneous IPSCs in Type A and B neurons in voltage clamp at +10 mV (bottom). **(G)** The peak amplitude of SOM interneuron-mediated IPSCs (left) and the corresponding inhibitory charge transfer (right) were similar in Type A and B neurons ( $p = 0.6$  and  $p = 0.8$ , respectively; n=7 pairs).

# FIGURE S1

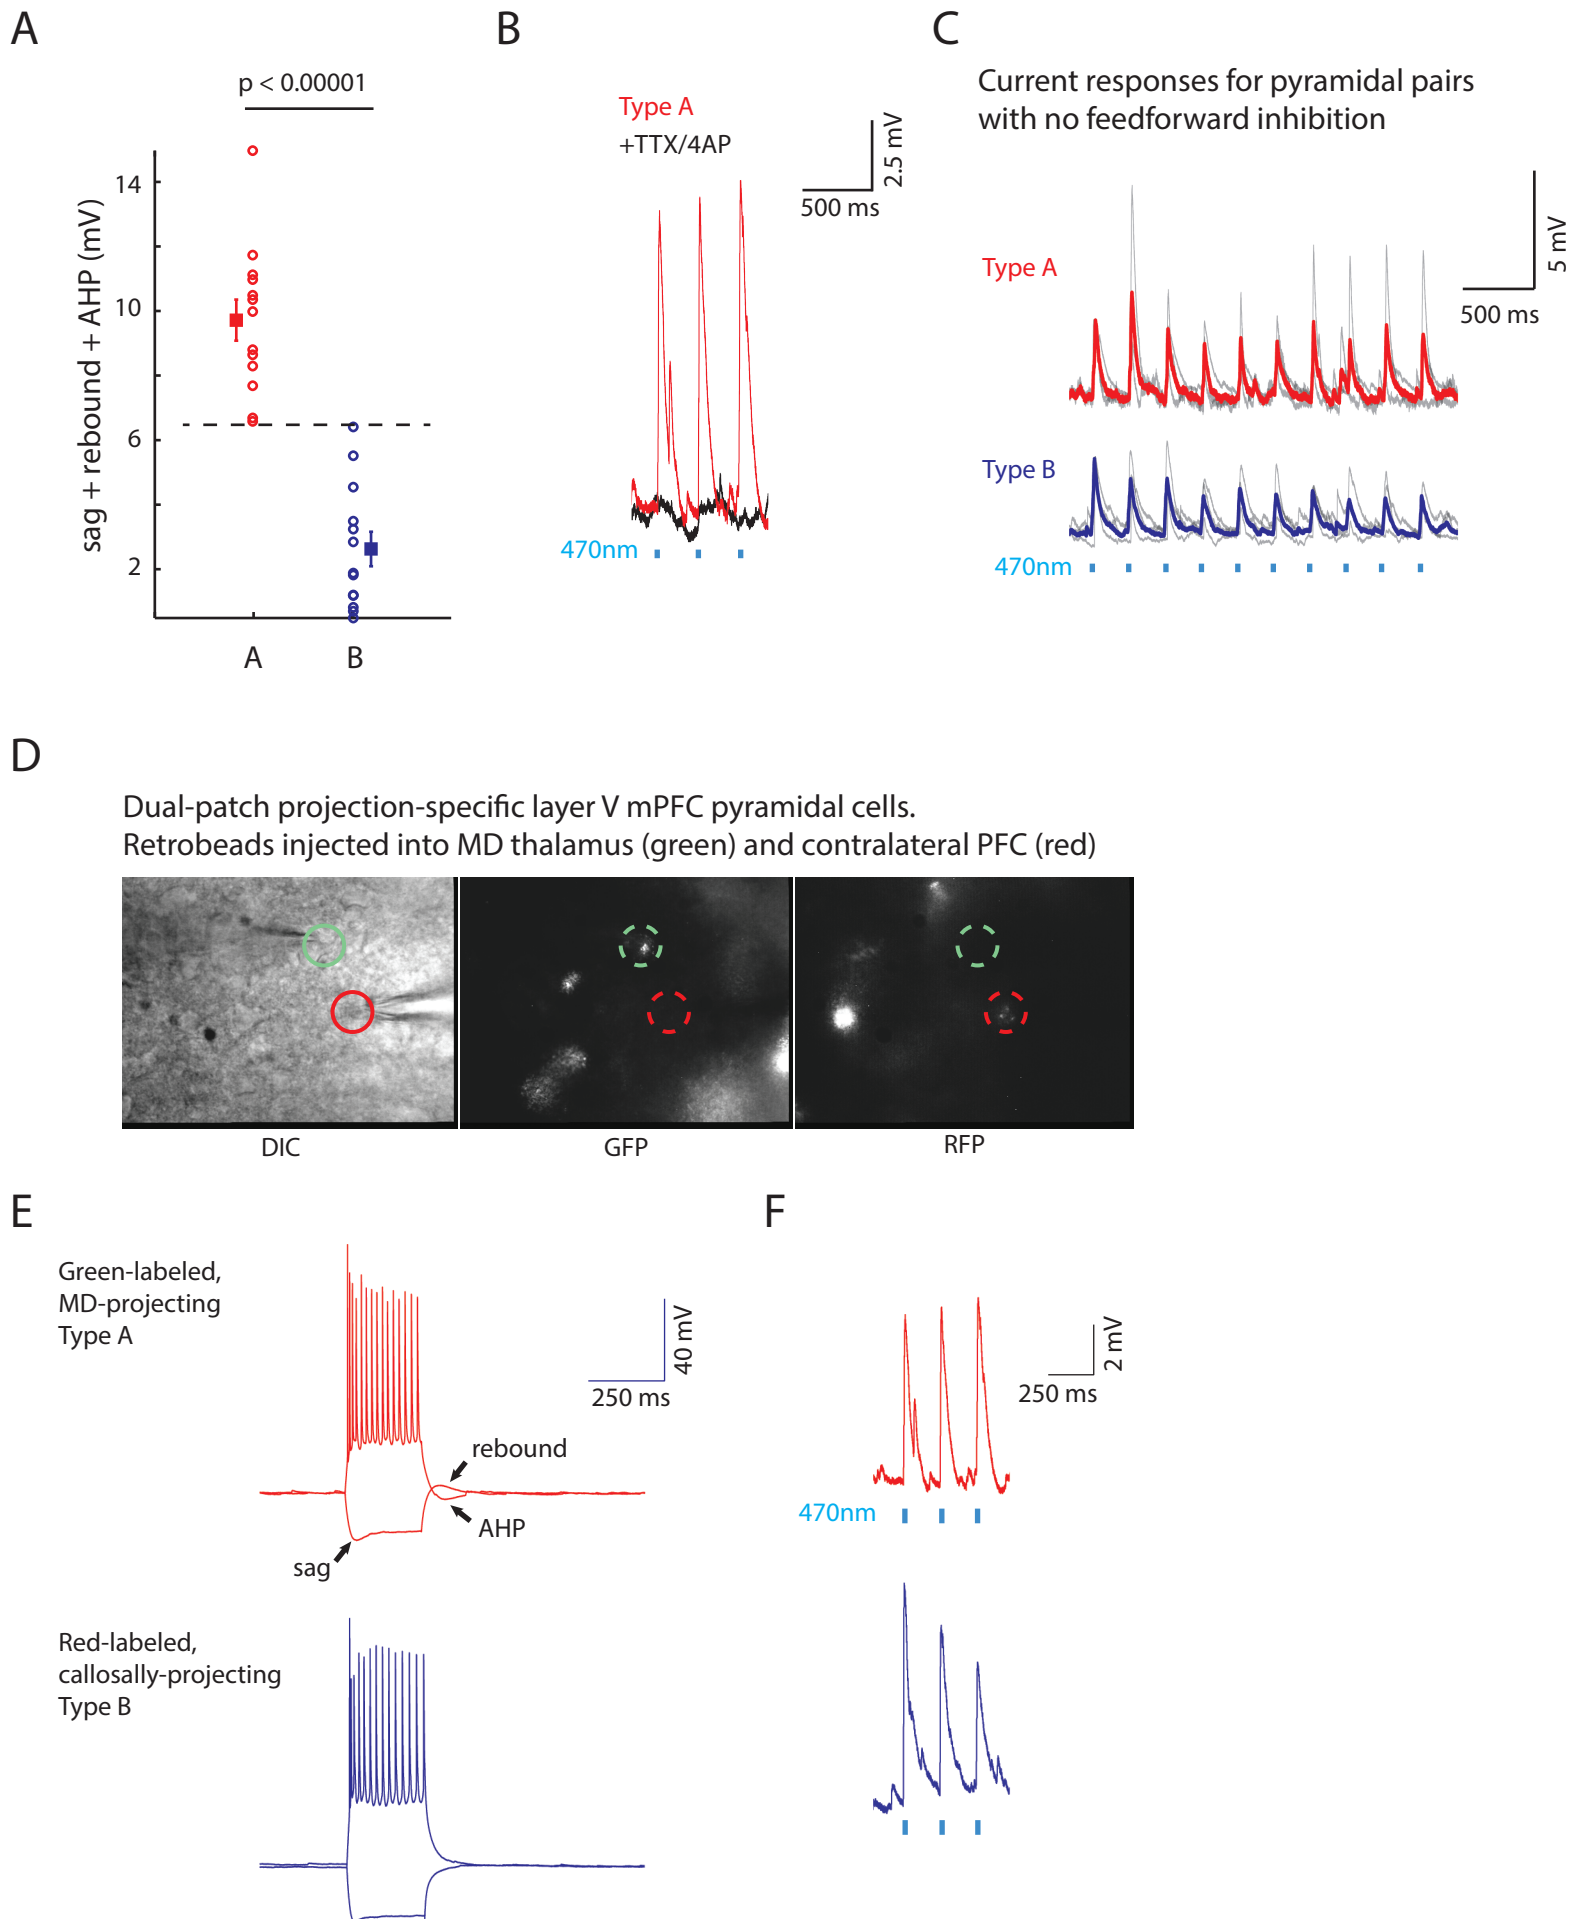

**FIGURE S2**

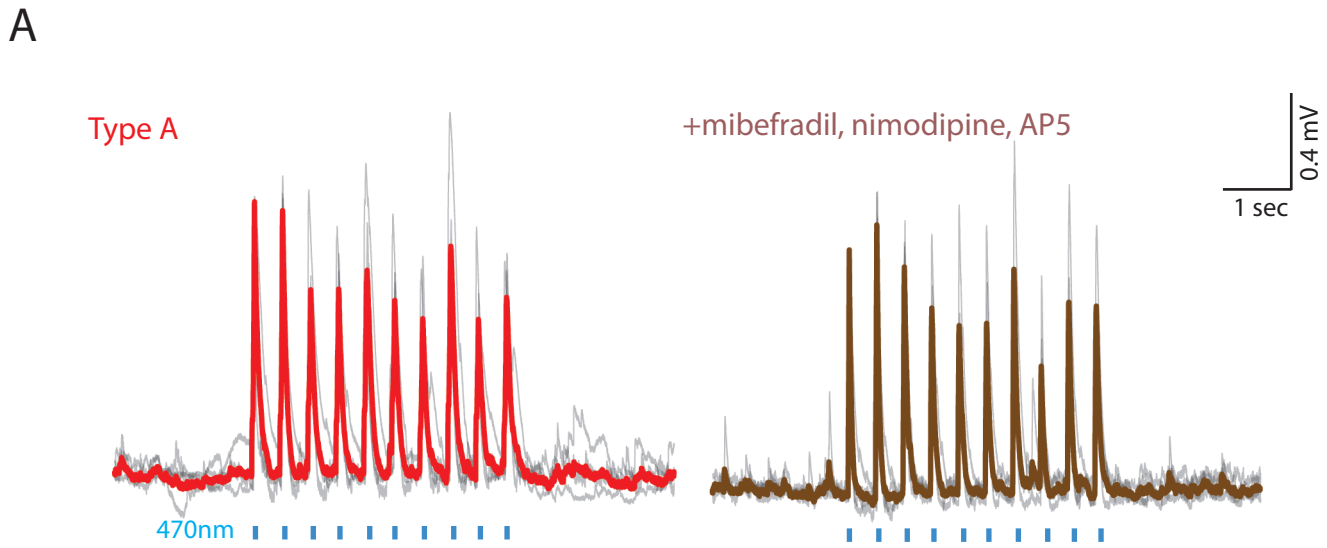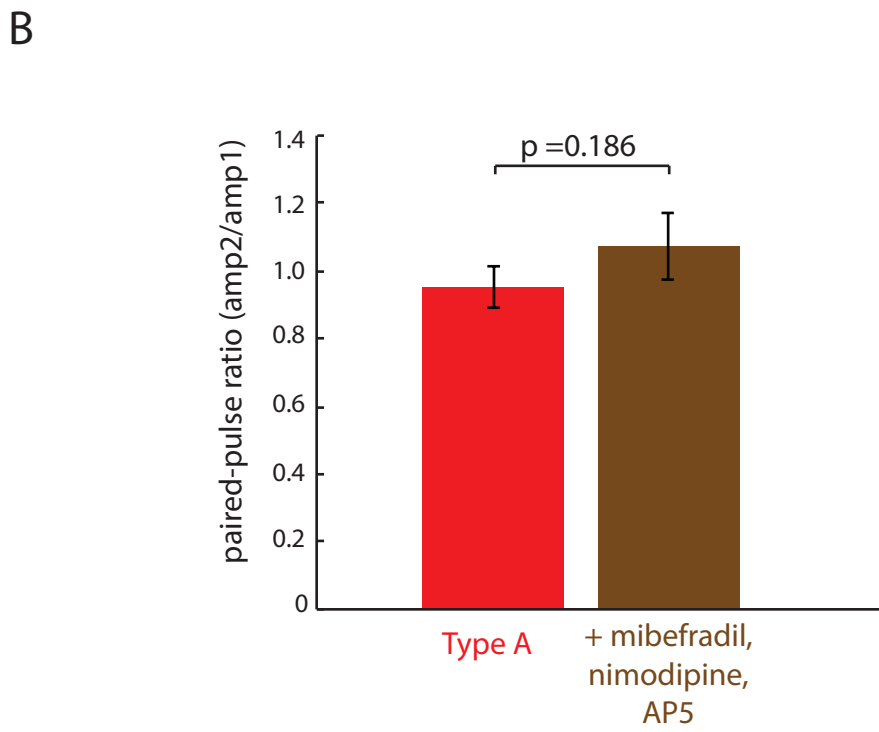

# FIGURE S3

A

Type A  
+ ZD7288 (25uM)

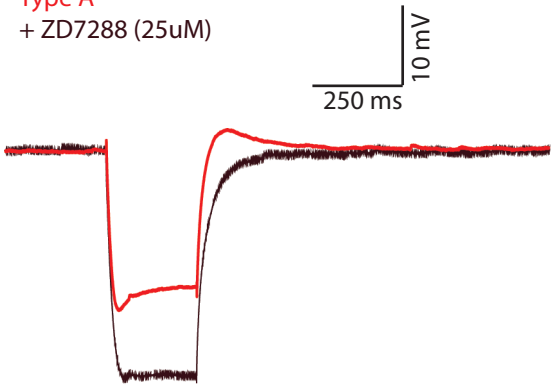

B

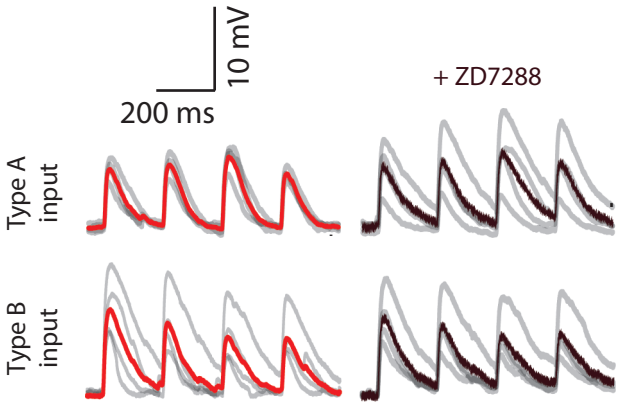

C

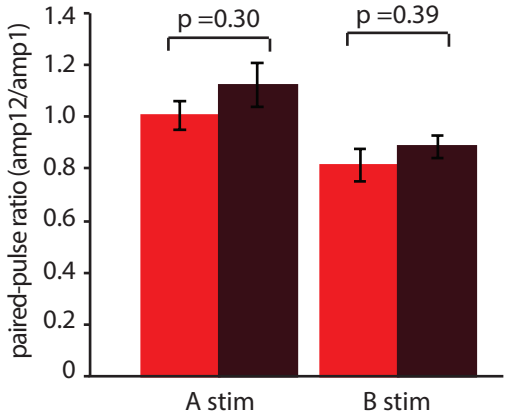

D

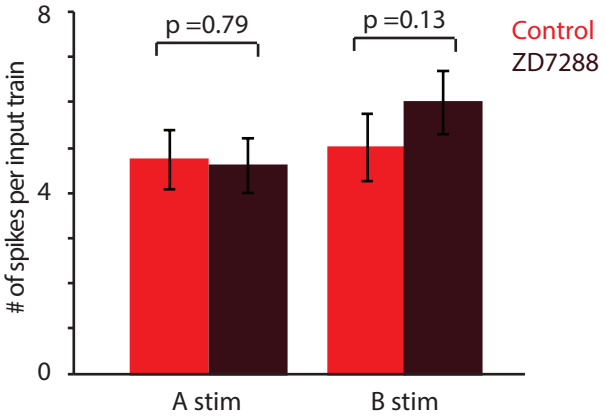

# FIGURE S4

## A1

Inhibitory current (in VC at +10 mV)

Type A control

+picrotoxin (10 $\mu$ M)

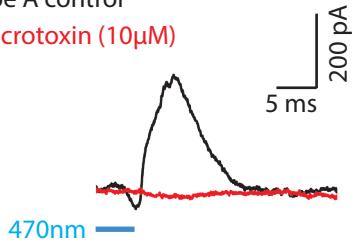

## A2

Normalized, average EPSP decay (recorded in current clamp)

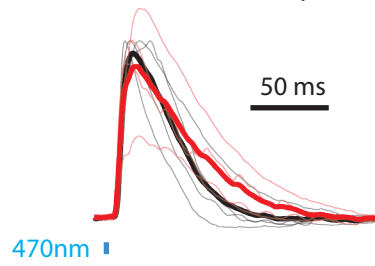

## A3

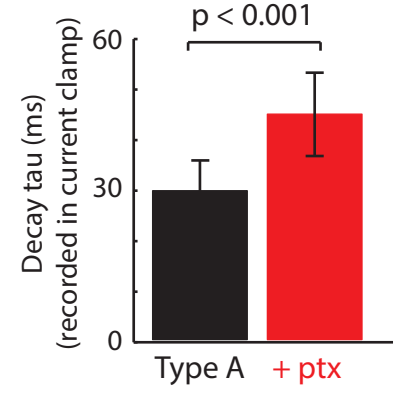

## B

Type A

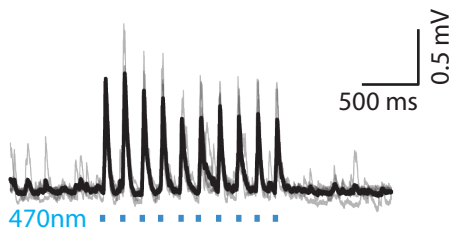

## D

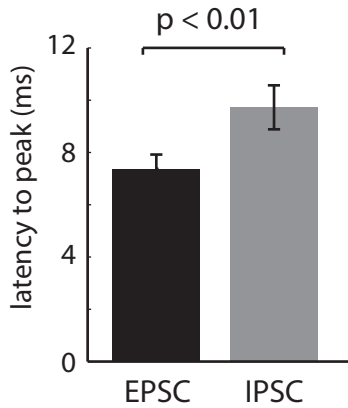

## E

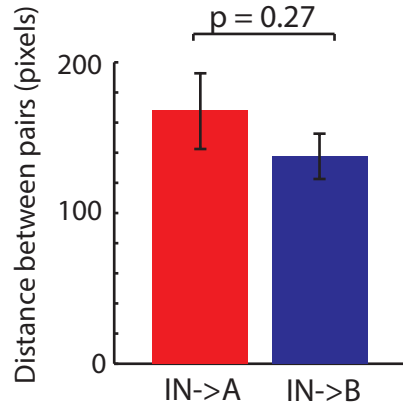

## F

SOM-cre + AAV-DIO-ChR2-eYFP

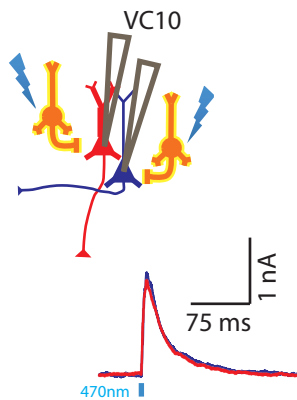

## G

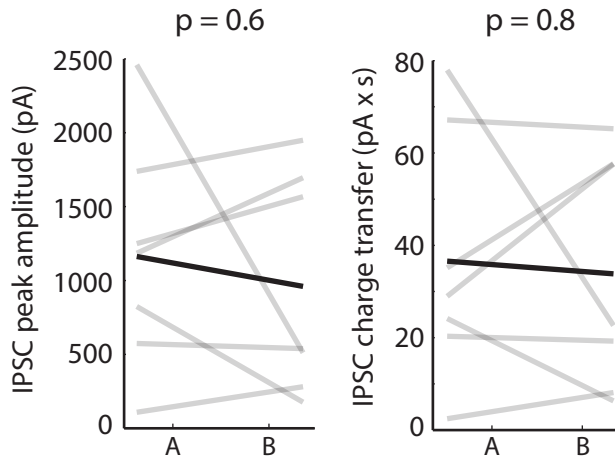

Supplement: NIHMS532262-supplement-01.pdf [file NIHMS532262-supplement-01.pdf]
